# Supplementary material
Source: Springer Nature journal article supplement (https://www.springermedizin.de/resource/supplementary/12933_2011_424_MOESM7_ESM.pdf/9538150)

CHOW

WESTERN

B6

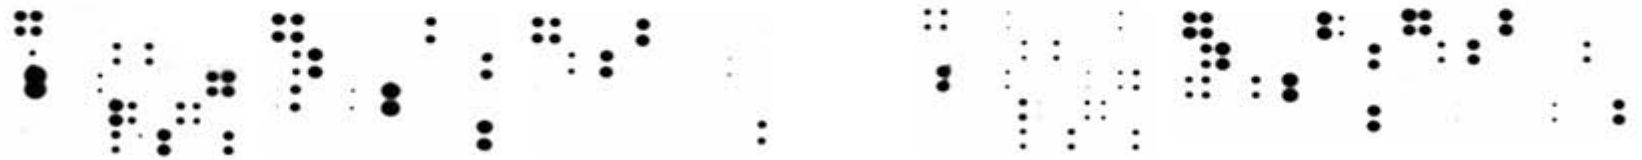

BALB

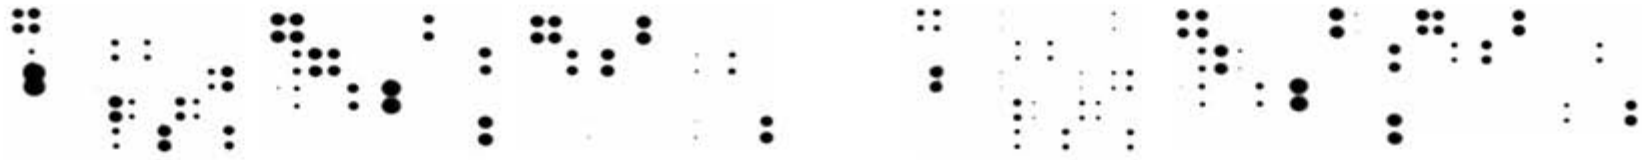

Supplement: MOESM7 [file 9538150]
